# Supplementary material
Source: PubMed Central journal article supplement (PMC6995777)

## Supplementary Material

### **MICE DEFICIENT IN PYRUVATE DEHYDROGENASE KINASE 4 ARE PROTECTED AGAINST ACETAMINOPHEN-INDUCED HEPATOTOXICITY**

Luqi Duan, Anup Ramachandran, Jephthe Y. Akakpo, Benjamin L. Woolbright, Yuxia Zhang and Hartmut Jaeschke

#### **Supplementary Figure 1:**

PDK4<sup>-/-</sup> primary mice hepatocytes do not differ from wild type mice in several respiration parameters. Primary hepatocytes were isolated from female wild type and PDK4<sup>-/-</sup> mice and OCR recorded by a Seahorse XF3 flux analyzer. Fold change in proton leak when represented as a percentage of basal respiration (A). Non-mitochondrial respiration rates (B), proton leak (C) and coupling efficiency (D) 12h after treatment of WT or PDK deficient cells with APAP (2mM). Fold change in liver lactate levels in PDK4 deficient mice when compared to WT mice (E). Data represent means  $\pm$  SE of n = 3-4.

**A**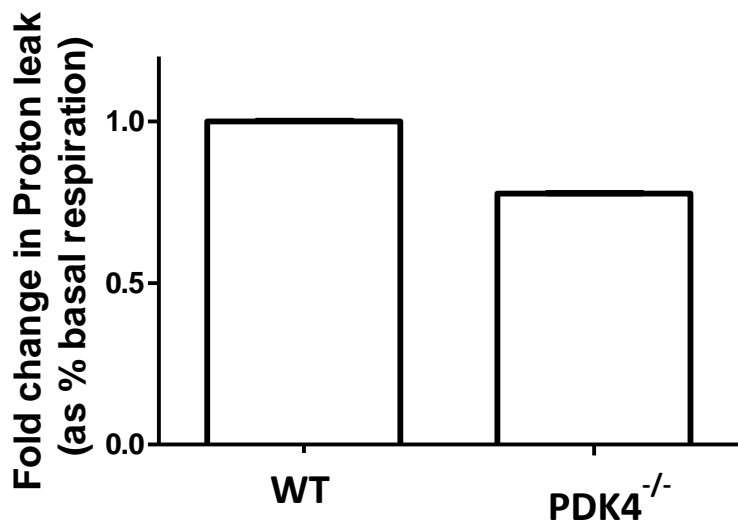**B**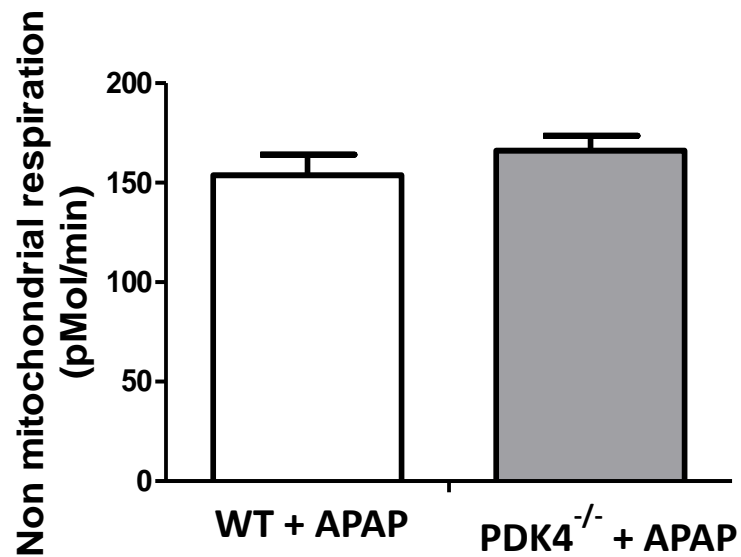**C**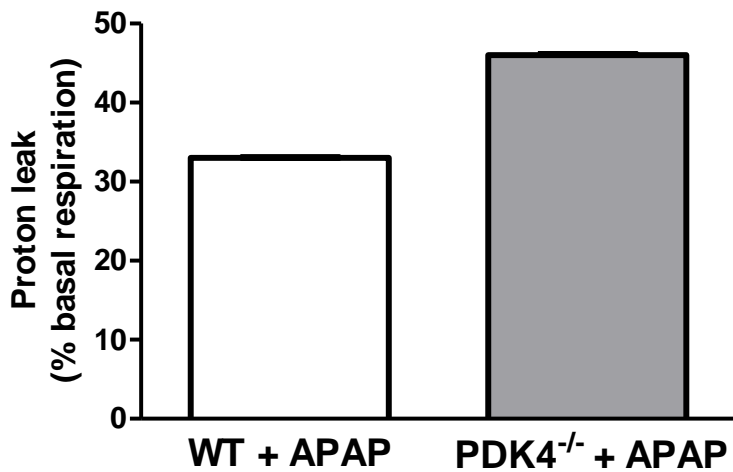**D**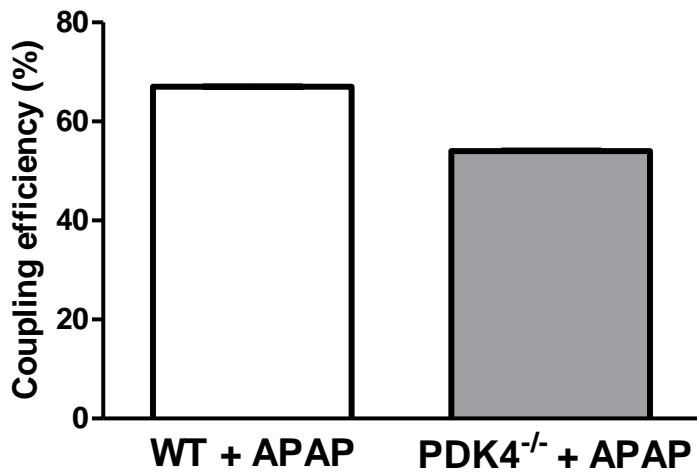**E**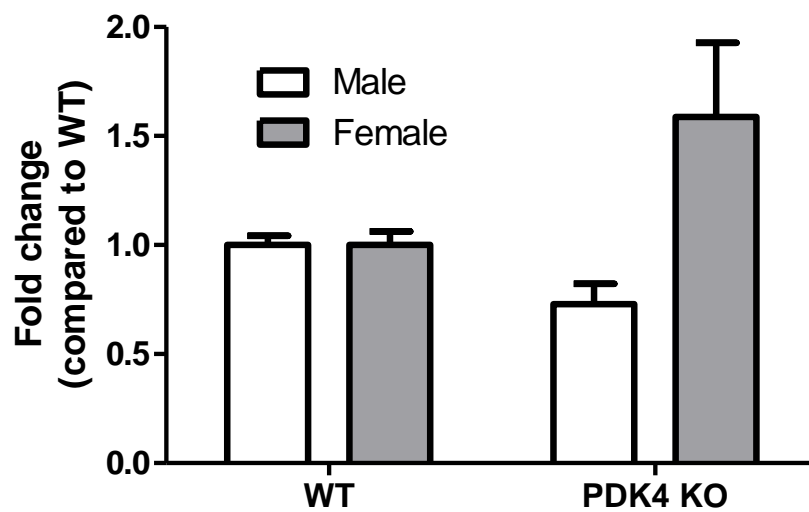

Supplement: NIHMS1546522-supplement-1.pdf [file NIHMS1546522-supplement-1.pdf]
